# Supplementary material for: Exploring the influence of testimonial source on attitudes towards e-mental health interventions among university students: Four-group randomized controlled trial
Source: PubMed Central journal article supplement (PMC8153476; doi:10.1371/journal.pone.0252012), 2021-05-26
Supplement: pone.0252012.s002.pdf [file pone.0252012.s002.pdf]

## Supporting Information

### S2 File. Appendix 2 on the Results section.

Supplementary analysis regarding the regression analysis.

*Notes:* Detailed information on the study data, including the data sets of the final (n=451) and the intention-to-treat (n=482) analyses, can be found here: GESIS repository (German “Leibniz Institut für Sozialwissenschaften”; SowiDataNet – datatorium); DOI: <https://doi.org/10.7802/2127>).

**Supplementary Table S1.** Sample characteristics in the intention-to-treat analysis

| Variables                                 |                                                        | <b>N = 482</b>                      |
|-------------------------------------------|--------------------------------------------------------|-------------------------------------|
| <b>Gender</b>                             | Female, n (%)                                          | 359 (74.5)                          |
|                                           | Male, n (%)                                            | 121 (25.1)                          |
|                                           | Other/diverse, n (%)                                   | 1 (0.2)                             |
| <b>Age (years)</b>                        | Mean (SD),<br>median, range (years)                    | 32.3 (10.15),<br>29.00, 18-65 years |
| <b>Educational attainment<sup>a</sup></b> | General certificate of secondary school, n (%)         | 14 (2.9)                            |
|                                           | Master craftsman´s diploma, n (%)                      | 10 (2.1)                            |
|                                           | Advanced college entrance qualification, n (%)         | 30 (6.2)                            |
|                                           | University entrance qualification, n (%)               | 207 (42.9)                          |
|                                           | College or university degree, n (%)                    | 182 (37.8)                          |
|                                           | - Bachelor degree, n (%)                               | 99 (20.5)                           |
|                                           | - Master degree, n (%)                                 | 61 (12.7)                           |
|                                           | - PhD level, n (%)                                     | 22 (4.6)                            |
|                                           | Other, n (%)                                           | 39 (8.1)                            |
| <b>Study program</b>                      | Distance-learning university, n (%)                    | 426 (88.4)                          |
|                                           | Traditional (on-campus) college or university, n (%)   | 30 (6.2)                            |
|                                           | Distance-learning and traditional study program, n (%) | 25 (5.2)                            |
|                                           | Postgraduate program, n (%)                            | 1 (0.2)                             |
| <b>Study time model</b>                   | Studying in full-time, n (%)                           | 257 (53.3)                          |

S2 File. Supporting information.

|                                                          |                                       |            |
|----------------------------------------------------------|---------------------------------------|------------|
|                                                          | Studying in part-time, n (%)          | 225 (46.7) |
|                                                          | Missing (postgraduate program), n (%) | 1 (0.2)    |
| <b>Awareness of e-mental health services<sup>b</sup></b> | No                                    | 282 (48.5) |
|                                                          | Yes                                   | 228 (39.2) |
|                                                          | Not sure                              | 48 (8.3)   |

N=482.

<sup>a</sup>Educational attainment refers to the German education system.

<sup>b</sup>Question: “Had you heard about e-mental health services prior to this study?”

As shown in Table S2, post hoc tests indicated that source credibility was higher in IG2 with *GET.ON* testimonials for employees than in IG1 with untargeted “MH-Online” testimonials. These differences were found overall (Games-Howell,  $\text{mean}_{\text{diff}}=0.42$ ,  $SE=0.13$ ,  $p=0.005$ , 95% CI [0.76, 0.09];  $d=0.45$ ), as well as for information alone (Tuckey-HSD,  $\text{mean}_{\text{diff}}=0.38$ ,  $SE=0.14$ ,  $p=0.021$ , 95% CI [0.03, 0.76];  $d=0.38$ ) and testimonials alone (Tuckey-HSD,  $\text{mean}_{\text{diff}}=0.45$ ,  $SE=0.13$ ,  $p=0.002$ , 95% CI [0.13, 0.77];  $d=0.43$ ). The three IGs ( $n=339$ ) differed significantly regarding the perceived similarity with the testimonial personas, with a large ES ( $\eta_p^2=.15$ ,  $d=0.84$ ). Games-Howell-adjusted post hoc tests showed that participants in IG3 (*StudiCare*) perceived narrators as significantly more similar to themselves as those in IG1 on the fictitious “MH-Online” ( $\text{mean}_{\text{diff}}=0.67$ ,  $SE=0.14$ ,  $p<0.001$ , 95% CI [0.36, 0.98];  $d=0.67$ ) and in IG3 on *GET.ON* ( $\text{mean}_{\text{diff}}=1.05$ ,  $SE=0.15$ ,  $p<0.001$ , 95% CI [0.71, 1.40];  $d=0.93$ ). Perceived similarity was also assessed higher in IG1 (fictitious “MH-Online”, with untargeted testimonials) than in IG2 (*GET.ON*), with testimonials targeting employees ( $\text{mean}_{\text{diff}}=0.39$ ,  $SE=0.14$ ,  $p=0.013$ , 95% CI [0.07, 0.71];  $d=0.38$ ).

**Supplementary Table S2.** Descriptive data and between-group differences regarding the determinants of attitudes towards e-mental health services among university students.

| Scale / Construct                                                                  | Range scale (min-max) | Overall (n=451) M (SD) | CG (n=112) M (SD) | IG 1 MH-Online (n=115) M (SD) | IG 2 GET.ON (n=116) M (SD) | IG 3 StudiCare (n=108) M (SD) | Difference <sup>a</sup> (groups), effect size                  | Post-hoc tests <sup>b,c</sup>                                                                                 |
|------------------------------------------------------------------------------------|-----------------------|------------------------|-------------------|-------------------------------|----------------------------|-------------------------------|----------------------------------------------------------------|---------------------------------------------------------------------------------------------------------------|
| Perceived Stress – PSS-10 (10 items), mean                                         | 1-5 (1.20-4.70)       | 2.71 (0.66)            | 2.70 (0.66)       | 2.69 (0.71)                   | 2.70 (0.62)                | 2.76 (0.65)                   | $F_{(3,447)} = 0.24$ , $p=0.865$ , $\eta_p^2=.002$             | N.A.                                                                                                          |
| Perceived Stress – PSS-10 (10 items), sum score                                    | 10-50 (12-47)         | 27.04 (6.64)           | 26.88 (6.64)      | 26.88 (7.15)                  | 26.91 (6.28)               | 27.53 (6.54)                  | $F_{(3,447)} = 0.25$ , $p=0.860$ , $\eta_p^2=.002$             | N.A.                                                                                                          |
| Perceived Similarity (5 items, IGs only, n=339)                                    | 1-7 (1.00-7.00)       | 3.95 (1.12) (n=339)    | N.A. in CG        | 3.87 (0.89)                   | 3.48 (1.15)                | 4.54 (1.12)                   | $F_{(2,336)} = 29.21$ , $p<0.001$ , $\eta_p^2= .15$ (large ES) | In IG3 higher than in IG1 and IG2, and in IG1 than IG2 <sup>b</sup> ( $ps<0.05$ )                             |
| Source Credibility (4 items, overall) <sup>d</sup>                                 | 1-7 (1.00-7.00)       | 5.05 (1.00)            | 5.15 (1.14)       | 4.79 (1.07)                   | 5.22 (0.85)                | 5.06 (0.88)                   | $F_{(3,447)} = 4.07$ , $p=0.007$ , $\eta_p^2=.03$ (small ES)   | In IG2 (GET.ON) higher than in IG1 <sup>b</sup> ( $p=0.005$ )                                                 |
| Source Credibility (2 items, information credibility) <sup>d</sup>                 | 1-7 (1.00-7.00)       | 5.08 (1.05)            | 5.15 (1.14)       | 4.86 (1.13)                   | 5.25 (0.91)                | 5.07 (0.98)                   | $F_{(3,447)} = 2.99$ , $p=0.031$ , $\eta_p^2=.02$ (small ES)   | IG2 higher than IG1 <sup>c</sup> , ( $p=0.021$ )                                                              |
| Source Credibility (2 items, testimonial credibility, IG1-IG3, n=339) <sup>d</sup> | 1-7 (1.00-7.00)       | 4.98 (1.02) (n=339)    | N.A. <sup>d</sup> | 4.73 (1.12)                   | 5.18 (0.95)                | 5.05 (0.93)                   | $F_{(3,336)} = 6.12$ , $p=0.002$ , $\eta_p^2=.04$ (small ES)   | In IG2 higher than in IG1 <sup>c</sup> , ( $p=0.002$ ), in IG3 higher than in IG1 <sup>c</sup> ( $p=0.002$ ), |

Notes. N=451. Abbreviations: ES=effect size, N.A.=not applicable.

<sup>a</sup>One-way ANOVA

<sup>b</sup>Post hoc test with Games-Howell adjustment

<sup>c</sup>Post hoc test with Tuckey-HSD-adjustment

<sup>d</sup>Perceived credibility was assessed with two items in the CG (in the IGs with four items).

**Supplementary Table S3.** Hierarchical multiple regression of information type, perceived stress, perceived similarity and source credibility on attitudes towards e-mental health services for stress coping (intention-to-treat analysis).

| Step 1    | Variable             | B    | SE (B) | $\beta$ | T     | p-value | 95% CI (B) |      |
|-----------|----------------------|------|--------|---------|-------|---------|------------|------|
|           | (Constant)           | .60  | 0.32   |         | 1.88  | 0.060   | -0.03      | 1.21 |
|           | IG3 vs. IG2          | .24  | 0.13   | .08     | 1.85  | 0.065   | -0.02      | 0.49 |
|           | IG3 vs. IG1          | .27  | 0.12   | .09     | 2.14  | 0.033   | 0.02       | 0.51 |
|           | Stress Level         | .07  | 0.07   | .04     | 1.08  | 0.281   | -0.06      | 0.21 |
|           | Perceived Similarity | .24  | 0.05   | .20     | 4.96  | <0.001  | 0.15       | 0.34 |
| $R^2=.37$ | Source Credibility   | .63  | 0.04   | .56     | 15.10 | <0.001  | 0.55       | 0.71 |
| Step 2    | Variable             | B    | SE (B) | $\beta$ | T     | p-value | 95% CI (B) |      |
|           | (Constant)           | -.47 | 0.25   |         | -1.88 | 0.061   | -0.97      | 0.02 |
|           | IG3 vs. IG2          | .01  | 0.10   | .004    | 0.12  | 0.907   | -0.19      | 0.21 |
|           | IG3 vs. IG1          | .20  | 0.10   | .07     | 2.07  | 0.039   | 0.01       | 0.39 |
|           | Stress Level         | .08  | 0.05   | .04     | 1.50  | 0.135   | -0.03      | 0.19 |
|           | Perceived Similarity | .12  | 0.04   | .10     | 3.00  | 0.003   | 0.04       | 0.19 |
|           | Source Credibility   | .35  | 0.04   | .31     | 9.92  | <0.001  | 0.28       | 0.42 |
| $R^2=.63$ | Baseline Attitude    | .60  | 0.03   | .58     | 17.94 | <0.001  | 0.54       | 0.67 |

N=482. Dependent variable: Attitude towards eMHSs at post-intervention; IG1=testimonials for MH-Online, IG2=testimonials for GET.ON, IG3=testimonials for StudiCare, SE=standard error B, CI=confidence interval. B=unstandardized coefficient;  $\beta$ =standardized coefficient (beta-weight). Step 1:  $R^2=.37$ ,  $F_{(5,476)} = 56.97$ ,  $p<0.001$ , (adjusted  $R^2=.37$ ); step 2:  $R^2=.63$ ,  $F_{(1,475)} = 321.74$ ,  $p<0.001$  (adjusted  $R^2=.62$ ), increase  $\Delta R^2 = .25$ .

Values of the CG for items on perceived similarity and credibility of testimonials were imputed (mean imputation).

Results of the regression analyses using listwise deletion (excl. the CG) for the per protocol (n=339) and ITT (n=361) sample, can be found elsewhere (SPSS output files, in the GESIS repository).

## Output files on the mediation analyses using the PROCESS macro

*Notes:* Variable names in the output files were modified for reporting purposes, since two researchers independently conducted the analyses with the same original data set, but used slightly different label names for the translation from German to English. The final material can be found here: <https://doi.org/10.7802/2127>.

### Per protocol analysis

#### Attitude short scale (post-intervention)

- Dependent variable (Y): Attitude toward eMHSs for stress coping (post-intervention)
- Independent variable (X): Targeted information type (student vs. employee)
- Mediator (Z): Perceived similarity

Run MATRIX procedure:

\*\*\*\*\* PROCESS Procedure for SPSS Version 3.00 \*\*\*\*\*

Written by Andrew F. Hayes, Ph.D.                      www.afhayes.com  
Documentation available in Hayes (2018). www.guilford.com/p/hayes3

\*\*\*\*\*

Model : 4  
Y : mean\_att (mean attitude short scale)  
X : study\_ar (study arm\_IG2vsIG3; dummy-coded)  
M : mean\_sim (mean similarity)

Sample  
Size: 224

\*\*\*\*\*

OUTCOME VARIABLE:  
mean\_sim

| Model Summary |       |       |        |         |        |          |       |
|---------------|-------|-------|--------|---------|--------|----------|-------|
|               | R     | R-sq  | MSE    | F       | df1    | df2      | p     |
|               | ,4308 | ,1856 | 1,2284 | 50,5941 | 1,0000 | 222,0000 | ,0000 |

| Model    |        |       |         |       |        |        |
|----------|--------|-------|---------|-------|--------|--------|
|          | coeff  | se    | t       | p     | LLCI   | ULCI   |
| constant | 3,4810 | ,1029 | 33,8273 | ,0000 | 3,2782 | 3,6838 |
| study_ar | 1,0542 | ,1482 | 7,1130  | ,0000 | ,7621  | 1,3462 |

\*\*\*\*\*

OUTCOME VARIABLE:  
mean\_att

S2 File. Supporting information.

Model Summary

| R     | R-sq  | MSE   | F       | df1    | df2      | p     |
|-------|-------|-------|---------|--------|----------|-------|
| ,3716 | ,1381 | ,9436 | 17,7043 | 2,0000 | 221,0000 | ,0000 |

Model

|          | coeff  | se    | t       | p     | LLCI   | ULCI   |
|----------|--------|-------|---------|-------|--------|--------|
| constant | 4,0243 | ,2238 | 17,9855 | ,0000 | 3,5834 | 4,4653 |
| study_ar | -,4423 | ,1439 | -3,0728 | ,0024 | -,7259 | -,1586 |
| mean_sim | ,3484  | ,0588 | 5,9224  | ,0000 | ,2325  | ,4643  |

\*\*\*\*\* TOTAL EFFECT MODEL \*\*\*\*\*

OUTCOME VARIABLE:

mean\_att

Model Summary

| R     | R-sq  | MSE    | F     | df1    | df2      | p     |
|-------|-------|--------|-------|--------|----------|-------|
| ,0361 | ,0013 | 1,0885 | ,2893 | 1,0000 | 222,0000 | ,5912 |

Model

|          | coeff  | se    | t       | p     | LLCI   | ULCI   |
|----------|--------|-------|---------|-------|--------|--------|
| constant | 5,2371 | ,0969 | 54,0636 | ,0000 | 5,0462 | 5,4280 |
| study_ar | -,0750 | ,1395 | -,5378  | ,5912 | -,3500 | ,1999  |

\*\*\*\*\* TOTAL, DIRECT, AND INDIRECT EFFECTS OF X ON Y \*\*\*\*\*

**Total effect of X on Y**

| Effect | se    | t      | p     | LLCI   | ULCI  | c_ps   |
|--------|-------|--------|-------|--------|-------|--------|
| -,0750 | ,1395 | -,5378 | ,5912 | -,3500 | ,1999 | -,0720 |

**Direct effect of X on Y**

| Effect | se    | t       | p     | LLCI   | ULCI   | c'_ps  |
|--------|-------|---------|-------|--------|--------|--------|
| -,4423 | ,1439 | -3,0728 | ,0024 | -,7259 | -,1586 | -,4246 |

**Indirect effect(s) of X on Y:**

|          | Effect | BootSE | BootLLCI | BootULCI |
|----------|--------|--------|----------|----------|
| mean_sim | ,3672  | ,0791  | ,2237    | ,5343    |

**Partially standardized indirect effect(s) of X on Y:**

|          | Effect | BootSE | BootLLCI | BootULCI |
|----------|--------|--------|----------|----------|
| mean_sim | ,3526  | ,0701  | ,2228    | ,4989    |

\*\*\*\*\* ANALYSIS NOTES AND ERRORS \*\*\*\*\*

Level of confidence for all confidence intervals in output:

95,0000

Number of bootstrap samples for percentile bootstrap confidence intervals:

5000

NOTE: Variables names longer than eight characters can produce incorrect output.

Shorter variable names are recommended.

----- END MATRIX -----

## Attitude toward online therapies (ETAM)

- Dependent variable (Y): Attitude toward online therapies, ETAM (post-intervention)
- Independent variable (X): Targeted information type (student vs. employee)
- Mediator (Z): Perceived similarity

Run MATRIX procedure:

\*\*\*\*\* PROCESS Procedure for SPSS Version 3.00 \*\*\*\*\*

Written by Andrew F. Hayes, Ph.D. [www.afhayes.com](http://www.afhayes.com)  
 Documentation available in Hayes (2018). [www.guilford.com/p/hayes3](http://www.guilford.com/p/hayes3)

\*\*\*\*\*

Model : 4  
 Y : mean\_eta (mean etam)  
 X : study\_ar (study arm\_IG2vsIG3; dummy-coded)  
 M : mean\_sim (mean similarity)

Sample  
 Size: 224

\*\*\*\*\*

OUTCOME VARIABLE:  
 mean\_sim

| Model Summary | R     | R-sq  | MSE    | F       | df1    | df2      | p     |
|---------------|-------|-------|--------|---------|--------|----------|-------|
|               | ,4308 | ,1856 | 1,2284 | 50,5941 | 1,0000 | 222,0000 | ,0000 |

| Model    | coeff  | se    | t       | p     | LLCI   | ULCI   |
|----------|--------|-------|---------|-------|--------|--------|
| constant | 3,4810 | ,1029 | 33,8273 | ,0000 | 3,2782 | 3,6838 |
| study_ar | 1,0542 | ,1482 | 7,1130  | ,0000 | ,7621  | 1,3462 |

\*\*\*\*\*

OUTCOME VARIABLE:  
 mean\_eta

| Model Summary | R     | R-sq  | MSE   | F      | df1    | df2      | p     |
|---------------|-------|-------|-------|--------|--------|----------|-------|
|               | ,2104 | ,0443 | ,2458 | 5,1207 | 2,0000 | 221,0000 | ,0067 |

| Model    | coeff  | se    | t       | p     | LLCI   | ULCI   |
|----------|--------|-------|---------|-------|--------|--------|
| constant | 2,8350 | ,1142 | 24,8245 | ,0000 | 2,6100 | 3,0601 |
| study_ar | -,1535 | ,0735 | -2,0895 | ,0378 | -,2983 | -,0087 |
| mean_sim | ,0927  | ,0300 | 3,0876  | ,0023 | ,0335  | ,1519  |

\*\*\*\*\* TOTAL EFFECT MODEL \*\*\*\*\*

OUTCOME VARIABLE:  
 mean\_eta

Model Summary

S2 File. Supporting information.

|       |       |       |       |        |          |       |
|-------|-------|-------|-------|--------|----------|-------|
| R     | R-sq  | MSE   | F     | df1    | df2      | p     |
| ,0553 | ,0031 | ,2553 | ,6818 | 1,0000 | 222,0000 | ,4098 |

Model

|          |        |       |         |       |        |        |
|----------|--------|-------|---------|-------|--------|--------|
|          | coeff  | se    | t       | p     | LLCI   | ULCI   |
| constant | 3,1577 | ,0469 | 67,3135 | ,0000 | 3,0653 | 3,2502 |
| study_ar | -,0558 | ,0676 | -,8257  | ,4098 | -,1889 | ,0774  |

\*\*\*\*\* TOTAL, DIRECT, AND INDIRECT EFFECTS OF X ON Y \*\*\*\*\*

**Total effect of X on Y**

|        |       |        |       |        |       |        |
|--------|-------|--------|-------|--------|-------|--------|
| Effect | se    | t      | p     | LLCI   | ULCI  | c_ps   |
| -,0558 | ,0676 | -,8257 | ,4098 | -,1889 | ,0774 | -,1105 |

**Direct effect of X on Y**

|        |       |         |       |        |        |        |
|--------|-------|---------|-------|--------|--------|--------|
| Effect | se    | t       | p     | LLCI   | ULCI   | c'_ps  |
| -,1535 | ,0735 | -2,0895 | ,0378 | -,2983 | -,0087 | -,3040 |

**Indirect effect(s) of X on Y:**

|          |        |        |          |          |
|----------|--------|--------|----------|----------|
|          | Effect | BootSE | BootLLCI | BootULCI |
| mean_sim | ,0977  | ,0327  | ,0375    | ,1652    |

**Partially standardized indirect effect(s) of X on Y:**

|          |        |        |          |          |
|----------|--------|--------|----------|----------|
|          | Effect | BootSE | BootLLCI | BootULCI |
| mean_sim | ,1936  | ,0634  | ,0748    | ,3209    |

\*\*\*\*\* ANALYSIS NOTES AND ERRORS \*\*\*\*\*

Level of confidence for all confidence intervals in output:  
95,0000

Number of bootstrap samples for percentile bootstrap confidence intervals:  
5000

NOTE: Variables names longer than eight characters can produce incorrect output.  
Shorter variable names are recommended.

----- END MATRIX -----



## Attitudes toward psychological online interventions (APOI)

- Dependent variable (Y): Attitude toward online therapies/interventions, APOI (post-intervention)
- Independent variable (X): Targeted information type (student vs. employee)
- Mediator (Z): Perceived similarity

Run MATRIX procedure:

\*\*\*\*\* PROCESS Procedure for SPSS Version 3.00 \*\*\*\*\*

Written by Andrew F. Hayes, Ph.D. [www.afhayes.com](http://www.afhayes.com)  
 Documentation available in Hayes (2018). [www.guilford.com/p/hayes3](http://www.guilford.com/p/hayes3)

\*\*\*\*\*

Model : 4  
 Y : mean\_apo (mean apoi)  
 X : study\_ar (study arm\_IG2vsIG3; dummy-coded)  
 M : mean\_sim (mean similarity)

Sample  
 Size: 224

\*\*\*\*\*

OUTCOME VARIABLE:  
 mean\_sim

| Model Summary | R     | R-sq  | MSE    | F       | df1    | df2      | p     |
|---------------|-------|-------|--------|---------|--------|----------|-------|
|               | ,4308 | ,1856 | 1,2284 | 50,5941 | 1,0000 | 222,0000 | ,0000 |

| Model    | coeff  | se    | t       | p     | LLCI   | ULCI   |
|----------|--------|-------|---------|-------|--------|--------|
| constant | 3,4810 | ,1029 | 33,8273 | ,0000 | 3,2782 | 3,6838 |
| study_ar | 1,0542 | ,1482 | 7,1130  | ,0000 | ,7621  | 1,3462 |

Covariance matrix of regression parameter estimates:

|          | constant | study_ar |
|----------|----------|----------|
| constant | ,0106    | -,0106   |
| study_ar | -,0106   | ,0220    |

\*\*\*\*\*

OUTCOME VARIABLE:  
 mean\_apo

| Model Summary | R     | R-sq  | MSE   | F      | df1    | df2      | p     |
|---------------|-------|-------|-------|--------|--------|----------|-------|
|               | ,2325 | ,0541 | ,2133 | 6,3150 | 2,0000 | 221,0000 | ,0022 |

| Model    | coeff  | se    | t       | p     | LLCI   | ULCI   |
|----------|--------|-------|---------|-------|--------|--------|
| constant | 2,8604 | ,1064 | 26,8902 | ,0000 | 2,6508 | 3,0700 |
| study_ar | -,1053 | ,0684 | -1,5388 | ,1253 | -,2402 | ,0296  |

S2 File. Supporting information.

mean\_sim ,0994 ,0280 3,5539 ,0005 ,0443 ,1545

Covariance matrix of regression parameter estimates:

|          | constant | study_ar | mean_sim |
|----------|----------|----------|----------|
| constant | ,0113    | ,0010    | -,0027   |
| study_ar | ,0010    | ,0047    | -,0008   |
| mean_sim | -,0027   | -,0008   | ,0008    |

\*\*\*\*\* TOTAL EFFECT MODEL \*\*\*\*\*

OUTCOME VARIABLE:

mean\_apoi

Model Summary

|  | R     | R-sq  | MSE   | F     | df1    | df2      | p     |
|--|-------|-------|-------|-------|--------|----------|-------|
|  | ,0006 | ,0000 | ,2244 | ,0001 | 1,0000 | 222,0000 | ,9933 |

Model

|          | coeff  | se    | t       | p     | LLCI   | ULCI   |
|----------|--------|-------|---------|-------|--------|--------|
| constant | 3,2064 | ,0440 | 72,8933 | ,0000 | 3,1197 | 3,2930 |
| study_ar | -,0005 | ,0633 | -,0084  | ,9933 | -,1254 | ,1243  |

Covariance matrix of regression parameter estimates:

|          | constant | study_ar |
|----------|----------|----------|
| constant | ,0019    | -,0019   |
| study_ar | -,0019   | ,0040    |

\*\*\*\*\* TOTAL, DIRECT, AND INDIRECT EFFECTS OF X ON Y \*\*\*\*\*

**Total effect of X on Y**

| Effect | se    | t      | p     | LLCI   | ULCI  | c_ps   |
|--------|-------|--------|-------|--------|-------|--------|
| -,0005 | ,0633 | -,0084 | ,9933 | -,1254 | ,1243 | -,0011 |

**Direct effect of X on Y**

| Effect | se    | t       | p     | LLCI   | ULCI  | c'_ps  |
|--------|-------|---------|-------|--------|-------|--------|
| -,1053 | ,0684 | -1,5388 | ,1253 | -,2402 | ,0296 | -,2228 |

**Indirect effect(s) of X on Y:**

|          | Effect | BootSE | BootLLCI | BootULCI |
|----------|--------|--------|----------|----------|
| mean_sim | ,1048  | ,0330  | ,0447    | ,1731    |

**Partially standardized indirect effect(s) of X on Y:**

|          | Effect | BootSE | BootLLCI | BootULCI |
|----------|--------|--------|----------|----------|
| mean_sim | ,2216  | ,0681  | ,0963    | ,3604    |

\*\*\*\*\* ANALYSIS NOTES AND ERRORS \*\*\*\*\*

Level of confidence for all confidence intervals in output:

95,0000

Number of bootstrap samples for percentile bootstrap confidence intervals:

5000

NOTE: Variables names longer than eight characters can produce incorrect output.

Shorter variable names are recommended.

----- END MATRIX -----

## Intention-to-treat mediation analyses

Run MATRIX procedure:

\*\*\*\*\* PROCESS Procedure for SPSS Version 3.00 \*\*\*\*\*

Written by Andrew F. Hayes, Ph.D.      www.afhayes.com  
 Documentation available in Hayes (2018). www.guilford.com/p/hayes3

\*\*\*\*\*

Model : 4  
 Y : S\_Attitu = mean\_att (mean attitude short scale)  
 X : IG3vsIG2 = study\_ar (study arm\_IG2vsIG3; dummy-coded)  
 M : S\_Simila = mean\_sim (mean similarity)

Sample  
 Size: 241

\*\*\*\*\*

OUTCOME VARIABLE:  
 S\_Simila

| Model Summary |       |       |        |         |        |          |       |
|---------------|-------|-------|--------|---------|--------|----------|-------|
|               | R     | R-sq  | MSE    | F       | df1    | df2      | p     |
|               | ,3861 | ,1491 | 1,2877 | 41,8785 | 1,0000 | 239,0000 | ,0000 |

| Model    |        |       |         |       |        |        |  |
|----------|--------|-------|---------|-------|--------|--------|--|
|          | coeff  | se    | t       | p     | LLCI   | ULCI   |  |
| constant | 3,5317 | ,1023 | 34,5174 | ,0000 | 3,3301 | 3,7333 |  |
| IG3vsIG2 | ,9463  | ,1462 | 6,4714  | ,0000 | ,6582  | 1,2343 |  |

\*\*\*\*\*

OUTCOME VARIABLE:  
 S\_Attitu

| Model Summary |       |       |        |         |        |          |       |
|---------------|-------|-------|--------|---------|--------|----------|-------|
|               | R     | R-sq  | MSE    | F       | df1    | df2      | p     |
|               | ,4006 | ,1605 | 1,0636 | 22,7471 | 2,0000 | 238,0000 | ,0000 |

| Model    |        |       |         |       |        |        |  |
|----------|--------|-------|---------|-------|--------|--------|--|
|          | coeff  | se    | t       | p     | LLCI   | ULCI   |  |
| constant | 3,7853 | ,2275 | 16,6391 | ,0000 | 3,3371 | 4,2334 |  |
| IG3vsIG2 | -,4835 | ,1441 | -3,3564 | ,0009 | -,7673 | -,1997 |  |
| S_Simila | ,3934  | ,0588 | 6,6928  | ,0000 | ,2776  | ,5093  |  |

\*\*\*\*\* TOTAL EFFECT MODEL \*\*\*\*\*

OUTCOME VARIABLE:  
 S\_Attitu

| Model Summary |       |       |        |       |        |          |       |
|---------------|-------|-------|--------|-------|--------|----------|-------|
|               | R     | R-sq  | MSE    | F     | df1    | df2      | p     |
|               | ,0497 | ,0025 | 1,2584 | ,5922 | 1,0000 | 239,0000 | ,4423 |

| Model    |        |       |         |       |        |        |  |
|----------|--------|-------|---------|-------|--------|--------|--|
|          | coeff  | se    | t       | p     | LLCI   | ULCI   |  |
| constant | 5,1748 | ,1011 | 51,1601 | ,0000 | 4,9755 | 5,3741 |  |

S2 File. Supporting information.

IG3vsIG2      -,1112            ,1446            -,7695            ,4423            -,3960            ,1735

\*\*\*\*\* TOTAL, DIRECT, AND INDIRECT EFFECTS OF X ON Y \*\*\*\*\*

Total effect of X on Y  
 Effect            se            t            p            LLCI            ULCI            c'\_ps  
 -,1112            ,1446            -,7695            ,4423            -,3960            ,1735            -,0992

Direct effect of X on Y  
 Effect            se            t            p            LLCI            ULCI            c'\_ps  
 -,4835            ,1441            -3,3564            ,0009            -,7673            -,1997            -,4314

Indirect effect(s) of X on Y:  
 Effect            BootSE            BootLLCI            BootULCI  
 S\_Simila            ,3723            ,0832            ,2217            ,5533

Partially standardized indirect effect(s) of X on Y:  
 Effect            BootSE            BootLLCI            BootULCI  
 S\_Simila            ,3322            ,0679            ,2065            ,4724

\*\*\*\*\* ANALYSIS NOTES AND ERRORS \*\*\*\*\*

Level of confidence for all confidence intervals in output:  
 95,0000

Number of bootstrap samples for percentile bootstrap confidence intervals:  
 5000

NOTE: Variables names longer than eight characters can produce incorrect output.  
 Shorter variable names are recommended.

----- END MATRIX -----

Run MATRIX procedure:

\*\*\*\*\* PROCESS Procedure for SPSS Version 3.00 \*\*\*\*\*

Written by Andrew F. Hayes, Ph.D.            www.afhayes.com  
 Documentation available in Hayes (2018). www.guilford.com/p/hayes3

\*\*\*\*\*

Model    : 4  
 Y    : S\_ETAM = mean\_eta (mean ETAM)  
 X    : IG3vsIG2 = study\_ar (study arm\_IG2vsIG3; dummy-coded)  
 M    : S\_Simila = mean\_sim (mean similarity)

Sample  
 Size: 241

\*\*\*\*\*

OUTCOME VARIABLE:  
 S\_Simila

Model Summary

|  | R     | R-sq  | MSE    | F       | df1    | df2      | p     |
|--|-------|-------|--------|---------|--------|----------|-------|
|  | ,3861 | ,1491 | 1,2877 | 41,8785 | 1,0000 | 239,0000 | ,0000 |

Model

|          | coeff  | se    | t       | p     | LLCI   | ULCI   |
|----------|--------|-------|---------|-------|--------|--------|
| constant | 3,5317 | ,1023 | 34,5174 | ,0000 | 3,3301 | 3,7333 |
| IG3vsIG2 | ,9463  | ,1462 | 6,4714  | ,0000 | ,6582  | 1,2343 |

\*\*\*\*\*  
 OUTCOME VARIABLE:  
 S\_ETAM

Model Summary

|  | R     | R-sq  | MSE   | F      | df1    | df2      | p     |
|--|-------|-------|-------|--------|--------|----------|-------|
|  | ,2481 | ,0616 | ,2553 | 7,8075 | 2,0000 | 238,0000 | ,0005 |

Model

|          | coeff  | se    | t       | p     | LLCI   | ULCI   |
|----------|--------|-------|---------|-------|--------|--------|
| constant | 2,7413 | ,1115 | 24,5929 | ,0000 | 2,5217 | 2,9609 |
| IG3vsIG2 | -,1450 | ,0706 | -2,0547 | ,0410 | -,2841 | -,0060 |
| S_Simila | ,1125  | ,0288 | 3,9070  | ,0001 | ,0558  | ,1693  |

\*\*\*\*\* TOTAL EFFECT MODEL \*\*\*\*\*  
 OUTCOME VARIABLE:  
 S\_ETAM

Model Summary

|  | R     | R-sq  | MSE   | F     | df1    | df2      | p     |
|--|-------|-------|-------|-------|--------|----------|-------|
|  | ,0372 | ,0014 | ,2706 | ,3307 | 1,0000 | 239,0000 | ,5658 |

Model

|          | coeff  | se    | t       | p     | LLCI   | ULCI   |
|----------|--------|-------|---------|-------|--------|--------|
| constant | 3,1388 | ,0469 | 66,9207 | ,0000 | 3,0464 | 3,2312 |
| IG3vsIG2 | -,0385 | ,0670 | -,5751  | ,5658 | -,1706 | ,0935  |

\*\*\*\*\* TOTAL, DIRECT, AND INDIRECT EFFECTS OF X ON Y \*\*\*\*\*

Total effect of X on Y

| Effect | se    | t      | p     | LLCI   | ULCI  | c'_ps  |
|--------|-------|--------|-------|--------|-------|--------|
| -,0385 | ,0670 | -,5751 | ,5658 | -,1706 | ,0935 | -,0742 |

Direct effect of X on Y

| Effect | se    | t       | p     | LLCI   | ULCI   | c'_ps  |
|--------|-------|---------|-------|--------|--------|--------|
| -,1450 | ,0706 | -2,0547 | ,0410 | -,2841 | -,0060 | -,2792 |

Indirect effect(s) of X on Y:

|          | Effect | BootSE | BootLLCI | BootULCI |
|----------|--------|--------|----------|----------|
| S_Simila | ,1065  | ,0347  | ,0439    | ,1797    |

Partially standardized indirect effect(s) of X on Y:

|          | Effect | BootSE | BootLLCI | BootULCI |
|----------|--------|--------|----------|----------|
| S_Simila | ,2050  | ,0625  | ,0871    | ,3327    |

\*\*\*\*\* ANALYSIS NOTES AND ERRORS \*\*\*\*\*

Level of confidence for all confidence intervals in output:

## S2 File. Supporting information.

95,0000

Number of bootstrap samples for percentile bootstrap confidence intervals:  
5000

NOTE: Variables names longer than eight characters can produce incorrect output.  
Shorter variable names are recommended.

----- END MATRIX -----

Run MATRIX procedure:

\*\*\*\*\* PROCESS Procedure for SPSS Version 3.00 \*\*\*\*\*

Written by Andrew F. Hayes, Ph.D.            www.afhayes.com  
Documentation available in Hayes (2018). www.guilford.com/p/hayes3

\*\*\*\*\*

Model : 4  
Y : S\_APOI = mean\_apo (mean APOI)  
X : IG3vsIG2 = study\_ar (study arm\_IG2vsIG3; dummy-coded)  
M : S\_Simila = mean\_sim (mean similarity)

Sample  
Size: 241

\*\*\*\*\*

OUTCOME VARIABLE:  
S\_Simila

| Model Summary | R     | R-sq  | MSE    | F       | df1    | df2      | p     |
|---------------|-------|-------|--------|---------|--------|----------|-------|
|               | ,3861 | ,1491 | 1,2877 | 41,8785 | 1,0000 | 239,0000 | ,0000 |

| Model    | coeff  | se    | t       | p     | LLCI   | ULCI   |
|----------|--------|-------|---------|-------|--------|--------|
| constant | 3,5317 | ,1023 | 34,5174 | ,0000 | 3,3301 | 3,7333 |
| IG3vsIG2 | ,9463  | ,1462 | 6,4714  | ,0000 | ,6582  | 1,2343 |

\*\*\*\*\*

OUTCOME VARIABLE:  
S\_APOI

| Model Summary | R     | R-sq  | MSE   | F      | df1    | df2      | p     |
|---------------|-------|-------|-------|--------|--------|----------|-------|
|               | ,2460 | ,0605 | ,2036 | 7,6672 | 2,0000 | 238,0000 | ,0006 |

| Model    | coeff  | se    | t       | p     | LLCI   | ULCI   |
|----------|--------|-------|---------|-------|--------|--------|
| constant | 2,8515 | ,0995 | 28,6471 | ,0000 | 2,6554 | 3,0476 |
| IG3vsIG2 | -,1052 | ,0630 | -1,6695 | ,0963 | -,2294 | ,0189  |
| S_Simila | ,1006  | ,0257 | 3,9121  | ,0001 | ,0500  | ,1513  |

\*\*\*\*\* TOTAL EFFECT MODEL \*\*\*\*\*

OUTCOME VARIABLE:  
S\_APOI

Model Summary

|  | R     | R-sq  | MSE   | F     | df1    | df2      | p     |
|--|-------|-------|-------|-------|--------|----------|-------|
|  | ,0108 | ,0001 | ,2158 | ,0280 | 1,0000 | 239,0000 | ,8672 |

Model

|          | coeff  | se    | t       | p     | LLCI   | ULCI   |
|----------|--------|-------|---------|-------|--------|--------|
| constant | 3,2069 | ,0419 | 76,5607 | ,0000 | 3,1244 | 3,2894 |
| IG3vsIG2 | -,0100 | ,0599 | -,1674  | ,8672 | -,1279 | ,1079  |

\*\*\*\*\* TOTAL, DIRECT, AND INDIRECT EFFECTS OF X ON Y \*\*\*\*\*

Total effect of X on Y

| Effect | se    | t      | p     | LLCI   | ULCI  | c_ps   |
|--------|-------|--------|-------|--------|-------|--------|
| -,0100 | ,0599 | -,1674 | ,8672 | -,1279 | ,1079 | -,0216 |

Direct effect of X on Y

| Effect | se    | t       | p     | LLCI   | ULCI  | c'_ps  |
|--------|-------|---------|-------|--------|-------|--------|
| -,1052 | ,0630 | -1,6695 | ,0963 | -,2294 | ,0189 | -,2270 |

Indirect effect(s) of X on Y:

|          | Effect | BootSE | BootLLCI | BootULCI |
|----------|--------|--------|----------|----------|
| S_Simila | ,0952  | ,0277  | ,0445    | ,1514    |

Partially standardized indirect effect(s) of X on Y:

|          | Effect | BootSE | BootLLCI | BootULCI |
|----------|--------|--------|----------|----------|
| S_Simila | ,2054  | ,0578  | ,0982    | ,3230    |

\*\*\*\*\* ANALYSIS NOTES AND ERRORS \*\*\*\*\*

Level of confidence for all confidence intervals in output:  
95,0000

Number of bootstrap samples for percentile bootstrap confidence intervals:  
5000

NOTE: Variables names longer than eight characters can produce incorrect output.  
Shorter variable names are recommended.

----- END MATRIX -----
