# Supplementary material for: Exploring the influence of testimonial source on attitudes towards e-mental health interventions among university students: Four-group randomized controlled trial
Source: PubMed Central journal article supplement (PMC8153476; doi:10.1371/journal.pone.0252012), 2021-05-26
Supplement: pone.0252012.s003.pdf [file pone.0252012.s003.pdf]

### S3 File. Appendix 3. (submitted version of the manuscript)

#### CONSORT-SPI 2018 Checklist

| SECTION                   | ITEM # | CONSORT-SPI 2010                                                                                                                                  | CONSORT-SPI 2018                                                                                              | REPORTED ON PAGE # |
|---------------------------|--------|---------------------------------------------------------------------------------------------------------------------------------------------------|---------------------------------------------------------------------------------------------------------------|--------------------|
| <b>TITLE AND ABSTRACT</b> |        |                                                                                                                                                   |                                                                                                               |                    |
|                           | 1a     | Identification as a randomised trial in the title <sup>§</sup>                                                                                    |                                                                                                               | 1                  |
|                           | 1b     | Structured summary of trial design, methods, results, and conclusions (for specific guidance see CONSORT for Abstracts) <sup>§</sup>              | Refer to CONSORT extension for social and psychological intervention trial abstracts                          | 2                  |
| <b>INTRODUCTION</b>       |        |                                                                                                                                                   |                                                                                                               |                    |
| Background and Objectives | 2a     | Scientific background and explanation of rationale <sup>§</sup>                                                                                   |                                                                                                               | 3                  |
|                           | 2b     | Specific objectives or hypotheses <sup>§</sup>                                                                                                    | If pre-specified, how the intervention was hypothesised to work                                               | 7                  |
| <b>METHODS</b>            |        |                                                                                                                                                   |                                                                                                               |                    |
| Trial Design              | 3a     | Describe of trial design (such as parallel, factorial), including allocation ratio <sup>§</sup>                                                   | If the unit of random assignment is not the individual, please refer to CONSORT for Cluster Randomized Trials | 8                  |
|                           | 3b     | Important changes to methods after trial commencement (such as eligibility criteria), with reasons                                                |                                                                                                               | NA                 |
| Participants              | 4a     | Eligibility criteria for participants <sup>§</sup>                                                                                                | When applicable, eligibility criteria for settings and those delivering the interventions                     | 9                  |
|                           | 4b     | Settings and locations where the data were collected                                                                                              |                                                                                                               | 8,9                |
| Interventions             | 5      | The interventions for each group with sufficient details to allow replication, including how and when they are actually administered <sup>§</sup> |                                                                                                               | 11                 |
|                           | 5a     |                                                                                                                                                   | Extent to which interventions were actually delivered by providers and taken up by participants as planned    | NA                 |

|                                  |     |                                                                                                                                                               |                                                                                       |        |
|----------------------------------|-----|---------------------------------------------------------------------------------------------------------------------------------------------------------------|---------------------------------------------------------------------------------------|--------|
|                                  | 5b  |                                                                                                                                                               | Where other informational materials about delivering the intervention can be accessed | NA     |
|                                  | 5c  |                                                                                                                                                               | When applicable, how intervention providers were assigned to each group               | NA     |
| Outcomes                         | 6a  | Completely defined pre-specified outcomes, including how and when they were assessed <sup>§</sup>                                                             |                                                                                       | 13     |
|                                  | 6b  | Any changes to trial outcomes after the trial commenced, with reasons                                                                                         |                                                                                       | NA     |
| Sample Size                      | 7a  | How sample size was determined <sup>§</sup>                                                                                                                   |                                                                                       | 9      |
|                                  | 7b  | When applicable, explanation of any interim analyses and stopping guidelines                                                                                  |                                                                                       | 9      |
| <b>RANDOMISATION</b>             |     |                                                                                                                                                               |                                                                                       |        |
| Sequence generation              | 8a  | Method used to generate the random allocation sequence                                                                                                        |                                                                                       | 10     |
|                                  | 8b  | Type of randomisation; detail of any restriction (such as blocking and block size) <sup>§</sup>                                                               |                                                                                       | 10     |
| Allocation concealment mechanism | 9   | Mechanism used to implement the random allocation sequence, describing any steps taken to conceal the sequence until interventions were assigned <sup>§</sup> |                                                                                       | 10     |
| Implementation                   | 10  | Who generated the random allocation sequence, who enrolled participants, and who assigned participants to interventions <sup>§</sup>                          |                                                                                       | 10     |
| Awareness of assignment          | 11a | Who was aware of intervention assignment after allocation (for example, participants, providers, those assessing outcomes), and how any masking was done      |                                                                                       | 10     |
|                                  | 11b | If relevant, description of the similarity of interventions                                                                                                   |                                                                                       | 11, 12 |

|                                                      |     |                                                                                                                                                                 |                                                                                                                          |                           |
|------------------------------------------------------|-----|-----------------------------------------------------------------------------------------------------------------------------------------------------------------|--------------------------------------------------------------------------------------------------------------------------|---------------------------|
| Analytical methods                                   | 12a | Statistical methods used to compare group outcomes <sup>§</sup>                                                                                                 | How missing data were handled, with details of any imputation method                                                     | 15-17                     |
|                                                      | 12b | Methods for additional analyses, such as subgroup analyses, adjusted analyses, and process evaluations                                                          |                                                                                                                          | 16                        |
| <b>RESULTS</b>                                       |     |                                                                                                                                                                 |                                                                                                                          |                           |
| Participant flow (a diagram is strongly recommended) | 13a | For each group, the numbers randomly assigned, receiving the intended intervention, and analysed for the outcomes <sup>§</sup>                                  | Where possible, the number approached, screened, and eligible prior to random assignment, with reasons for non-enrolment | 17, <a href="#">Fig 2</a> |
|                                                      | 13b | For each group, losses and exclusions after randomisation, together with reasons <sup>§</sup>                                                                   |                                                                                                                          | 17, <a href="#">Fig 2</a> |
| Recruitment                                          | 14a | Dates defining the periods of recruitment and follow-up                                                                                                         |                                                                                                                          | 9                         |
|                                                      | 14b | Why the trial ended or was stopped                                                                                                                              |                                                                                                                          | NA                        |
| Baseline data                                        | 15  | A table showing baseline characteristics for each group <sup>§</sup>                                                                                            | Include socioeconomic variables where applicable                                                                         | 18                        |
| Numbers analysed                                     | 16  | For each group, number included in each analysis and whether the analysis was by original assigned groups <sup>§</sup>                                          |                                                                                                                          | 18                        |
| Outcomes and estimation                              | 17a | For each outcome, results for each group, and the estimated effect size and its precision (such as 95% confidence interval) <sup>§</sup>                        | Indicate availability of trial data                                                                                      |                           |
|                                                      | 17b | For binary outcomes, the presentation of both absolute and relative effect sizes is recommended                                                                 |                                                                                                                          |                           |
| Ancillary analyses                                   | 18  | Results of any other analyses performed, including subgroup analyses, adjusted analyses, and process evaluations, distinguishing pre-specified from exploratory |                                                                                                                          |                           |
| Harms                                                | 19  | All important harms or unintended effects in each group (for specific guidance see CONSORT for Harms)                                                           |                                                                                                                          |                           |
| <b>DISCUSSION</b>                                    |     |                                                                                                                                                                 |                                                                                                                          |                           |

|                              |     |                                                                                                                                                                                                 |                                                                                                                  |        |
|------------------------------|-----|-------------------------------------------------------------------------------------------------------------------------------------------------------------------------------------------------|------------------------------------------------------------------------------------------------------------------|--------|
| Limitations                  | 20  | Summarize the main results (including an overview of concepts, themes, and types of evidence available), link to the review questions and objectives, and consider the relevance to key groups. | Trial limitations, addressing sources of potential bias, imprecision, and, if relevant, multiplicity of analyses | 24, 28 |
| Generalisability             | 21  | Discuss the limitations of the scoping review process.                                                                                                                                          | Generalisability (external validity, applicability) of the trial findings <sup>§</sup>                           | 28     |
| Interpretation               | 22  | Provide a general interpretation of the results with respect to the review questions and objectives, as well as potential implications and/or next steps.                                       | Interpretation consistent with results, balancing benefits and harms, and considering other relevant evidence    | 24-27  |
| <b>IMPORTANT INFORMATION</b> |     |                                                                                                                                                                                                 |                                                                                                                  |        |
| Registration                 | 23  | Registration number and name of trial registry                                                                                                                                                  |                                                                                                                  | NA     |
| Protocol                     | 24  | Where the full trial protocol can be accessed, if available                                                                                                                                     |                                                                                                                  | NA     |
| Declaration of Interests     | 25  | Sources of funding and other support; role of funders                                                                                                                                           | Declaration of any other potential interests                                                                     | 30     |
| Stakeholder investments      | 26a |                                                                                                                                                                                                 | Any involvement of the intervention developer in the design, conduct, analysis, or reporting of the trial        | NA     |
|                              | 26b |                                                                                                                                                                                                 | Other stakeholder involvement in trial design, conduct, or analyses                                              | NA     |
|                              | 26c |                                                                                                                                                                                                 | Incentives offered as part of the trial                                                                          | 9      |

This table lists items from the CONSORT 2010 checklist (with some modifications for social and psychological intervention trials) and additional items in the CONSORT-SPI 2018 extension. Empty rows in the 'CONSORT-SPI 2018' column indicate that there is no extension to the CONSORT 2010 item

\*We strongly recommended that the CONSORT-SPI 2018 Explanation and Elaboration (E&E) document be reviewed when using the CONSORT-SPI 2018 checklist for important clarifications on each item

§An extension item for cluster trials exists for this CONSORT 2010 item

*Note:* Fig 2 (participant flow chart) is Fig3 in the revised manuscript.

## Citations

Montgomery, P., Grant, S., Mayo-Wilson, E., Macdonald, G., Michie, S., Hopewell, S., & Moher, D. (2018). Reporting randomised trials of social and psychological interventions: the CONSORT-SPI 2018 Extension. *Trials*, *19*(1), 407.

Grant, S., Mayo-Wilson, E., Montgomery, P., Macdonald, G., Michie, S., Hopewell, S., & Moher, D. (2018). CONSORT-SPI 2018 Explanation and Elaboration: guidance for reporting social and psychological intervention trials. *Trials*, *19*(1), 406.
